# Supplementary material
Source: PubMed Central journal article supplement (PMC7723751)
Supplement: NIHMS1648000-supplement-1.pdf [file NIHMS1648000-supplement-1.pdf]

## Supplementary Information

### Measurement of Inhibitor Potency on sEH and FAAH

Quantification of inhibitor potencies were performed following previously published procedures:

For human sEH enzyme: sEH activity was measured using the substrate cyano(6-methoxynaphthalen-2-yl)methyl ((3-phenyloxiran-2-yl)methyl) carbonate (CMNPC) ( $[S]_{\text{final}} = 5 \mu\text{M}$ ), which generates fluorescent 6-methoxynaphthaldehyde ( $\lambda_{\text{excitation}} = 330 \text{ nm}$ ,  $\lambda_{\text{emission}} = 465 \text{ nm}$ ,  $25 \text{ }^\circ\text{C}$ ) after hydrolysis. Inhibition was measured in sodium phosphate buffer (0.1 M, pH = 7.4, 0.1 mg/mL bovine serum albumin (BSA)) containing partially purified sEH from baculovirus or partially purified liver extract. (Jones 2005, Rose 2010)

For human FAAH enzyme: FAAH activity was measured using the substrate N-(6-methoxy-pyridin-3-yl) octanamide (OMP) ( $[S]_{\text{final}} = 5 \mu\text{M}$ ), which generated fluorescent 6-methoxy-pyridine ( $\lambda_{\text{excitation}} = 303 \text{ nm}$ ,  $\lambda_{\text{emission}} = 394 \text{ nm}$ ,  $37 \text{ }^\circ\text{C}$ ) after hydrolysis. Inhibition was measured in sodium phosphate buffer (0.1 M, pH = 8, 0.1 mg/mL BSA) containing crude FAAH extract from baculovirus or brain microsomes with a final DMSO concentration of 2%. (Huang 2007, Kodani 2016).

For both enzymes, generated fluorescence was quantified every 30 seconds for 10 minutes and the linear portion of the curve was used to generate the reaction velocity ( $v_{\text{inhibitor}}$ ). Values were subtracted from wells containing no enzyme.  $\text{IC}_{50}$ 's were quantified by simple linear regression of the  $\log [I]$  vs. % remaining activity ( $v_{\text{inhibitor}}/v_{\text{DMSO}}$ ) and determining  $x$  when  $y = 0.50$ .

All measurements were the average of triplicates.

### Supplementary References:

Jones PD, Wolf NM, Morisseau C, Whetstone P, Hock B, Hammock BD. Fluorescent substrates for soluble epoxide hydrolase and application to inhibition studies. *Anal Biochem* 2005; 343:66-75.

Rose TE, Morisseau C, Liu JY, Inceoglu B, Jones PD, Sanborn JR, Hammock BD. 1-Aryl-3-(1-acylpiperidin-4-yl)urea Inhibitors of Human and Murine Soluble Epoxide Hydrolase: Structure-Activity Relationships, Pharmacokinetics, and Reduction of Inflammatory Pain. *J Med Chem* 2010; 53:7067-7075.

Kodani SD, Overby HB, Morisseau C, Chen J, Zhao L, Hammock BD. Parabens inhibit fatty acid amide hydrolase: A potential role in paraben-enhanced 3T3-L1 adipocyte differentiation. *Tox Lett* 2016; 262:92-99

Huang H, Nishi K, Tsai HJ, Hammock BD. Development of highly sensitive fluorescent assays for fatty acid amide hydrolase. *Anal Biochem* 2007; 363:12-21
